# Supplementary material for: Host genetic factors related to innate immunity, environmental sensing and cellular functions are associated with human skin microbiota
Source: PubMed Central journal article supplement (PMC9582029; doi:10.1038/s41467-022-33906-5), 2022-10-19
Supplement: 41467_2022_33906_MOESM1_ESM.pdf [file 41467_2022_33906_MOESM1_ESM.pdf]

## Title

Host genetic factors related to innate immunity, environmental sensing and cellular functions are associated with human skin microbiota

## Author list

Lucas Moitinho-Silva<sup>1,2</sup>, Frauke Degenhardt<sup>1</sup>, Elke Rodriguez<sup>2</sup>, Hila Emmert<sup>2</sup>, Simonas Juzenas<sup>1,3</sup>, Lena Möbus<sup>2</sup>, Florian Uellendahl-Werth<sup>1</sup>, Nicole Sander<sup>2</sup>, Hansjörg Baurecht<sup>4</sup>, Lukas Tittmann<sup>5</sup>, Wolfgang Lieb<sup>6</sup>, Christian Gieger<sup>7,8</sup>, Annette Peters<sup>7</sup>, David Ellinghaus<sup>1</sup>, Corinna Bang<sup>1</sup>, Andre Franke<sup>1#\*</sup>, Stephan Weidinger<sup>2#\*</sup> and Malte Christoph Rühlemann<sup>1#</sup>

## Affiliations

<sup>1</sup>Institute of Clinical Molecular Biology, Kiel University, Kiel, Germany

<sup>2</sup>Department of Dermatology and Allergy, University Hospital Schleswig-Holstein, Kiel, Germany

<sup>3</sup>Institute of Biotechnology, Life Science Centre, Vilnius University, Vilnius, Lithuania

<sup>4</sup>Department for Epidemiology and Preventive Medicine, University of Regensburg, Regensburg, Germany

<sup>5</sup>Biobank PopGen and Institute of Epidemiology, Kiel University, Kiel, Germany

<sup>6</sup>Institute of Epidemiology, Kiel University, Kiel, Germany

<sup>7</sup>Institute of Epidemiology, Helmholtz Zentrum München – German Research Center for Environmental Health, Neuherberg, Germany

<sup>8</sup>Research Unit of Molecular Epidemiology, Helmholtz Zentrum München – German Research Center for Environmental Health, Neuherberg, Germany

#Authors contributed equally.

\*Corresponding authors: AF, [a.franke@mucosa.de](mailto:a.franke@mucosa.de); SW, [sweidinger@dermatology.uni-kiel.de](mailto:sweidinger@dermatology.uni-kiel.de).

## Supplementary Table

Supplementary Table 1. Samples collected for microbial profiling.

|                     | KORA FF4 (N = 635) | PopGen (N = 1021) |
|---------------------|--------------------|-------------------|
| <b>Dry</b>          |                    |                   |
| Dorsal forearm      | -                  | 260 (25)          |
| Volar forearm       | -                  | 251 (25)          |
| <b>Moist</b>        |                    |                   |
| Antecubital fossa   | 318 (50)           | 258 (25)          |
| <b>Sebaceous</b>    |                    |                   |
| Forehead            | -                  | 252 (25)          |
| Retroauricular fold | 317 (50)           | -                 |

Percentages are shown (%).
